# Supplementary material for: Histone Parylation factor 1 contributes to the inhibition of PARP1 by cancer drugs
Source: PubMed Central journal article supplement (PMC7854685; doi:10.1038/s41467-021-20998-8), 2021-02-02

## Supplementary Material for

Histone PARylation Factor 1 Contributes to the Inhibition of PARP1 by Cancer Drugs  
Johannes Rudolph<sup>1</sup>, Genevieve Roberts<sup>1</sup>, Karolin Luger<sup>\*1,2</sup>

**Supplementary Table 1:** Maximal  $t_{1/2}$  values and minimal  $k_{on}$  values (with standard deviation) are shown for each PARPi in the presence or absence of HPF1 for both PARP1 and PARP2. The maximal  $t_{1/2}$  values reflect the longest possible half-life for dissociation of different PARPi's from PARP1 (assuming  $k_{on} = 0$ ). These values were derived from the  $k_{obs}$  fits at 19 nM of each PARPi (just over one equivalent PARPi vs. PARP1 or PARP2). The minimal  $k_{on}$  values are derived from the measured  $K_D$  (see Table 1) and the maximal  $t_{1/2}$  values ( $k_{on} = \ln 2 / (K_D * t_{1/2})$ ). The number of replicates for each experiment is the same as in Table 1.

**Supplementary Figure 1:** Release of fluorescently labeled DNA from PARP2 reveals the binding affinity of PARPi for PARP2 and demonstrates that HPF1 does not affect the apparent release of PARPi from PARP2. A) – C) Representative data p18mer\*-release data for assay of olaparib, veliparib, and talazoparib with PARP2 alone. D) – F) Representative p18mer\*-release data for assay of olaparib, veliparib, and talazoparib with PARP2 in the presence of HPF1. The concentrations of the inhibitors used in A – F are noted on the right in units of nanomolar. The lines through the shown data points reflect fitting to first-order kinetics (see Methods).

**Supplementary Figure 2:** Release of fluorescently labeled DNA from PARP1 reveals the binding affinity of PARPi for PARP1 and demonstrates that HPF1 slows the apparent release of PARPi from PARP1. A) – D) Representative data p18mer\*-release data for assay of AZD-2461, niraparib, A-966492, and rucaparib with PARP1 alone. E) – H) Representative p18mer\*-release data for assay of AZD-2461, niraparib, A-966492, and rucaparib with PARP1 in the presence of HPF1. The concentrations of the inhibitors used in A – H are noted on the right in units of nanomolar. The lines through the shown data points reflect fitting to first-order kinetics (see Methods).

**Supplementary Figure 3:** Release of fluorescently labeled DNA from PARP1 reveals that iniparib is not an inhibitor of PARP1. Note that all concentrations of inhibitor yield the same apparent rate, unlike what is seen for effective PARPi (compare with Fig. 1 and Supp. Fig. 2)

**Supplementary Figure 4:** Release of fluorescently labeled DNA from PARP1 and PARP2 in the absence of PARPi was measured in the presence or absence of HPF1 to determine the value of  $k_2[\text{NAD}^+]$  needed for analysis of the data (see Methods). A) Representative traces from a dissociation experiment from PARP1 performed in the absence or presence of HPF1, without any PARPi present. B) Bar graph from multiple replicates ( $n > 20$ ) demonstrating that PARylation of PARP1 in the presence of HPF1 is 1.4-fold slower than in its absence ( $k_{obs(+HPF1)} = 0.025 \pm 0.006 \text{ s}^{-1}$  vs.  $k_{obs(-HPF1)} = 0.036 \pm$

0.01 s<sup>-1</sup>). C) Representative traces from a dissociation experiment from PARP2 performed in the absence or presence of HPF1, without any PARPi present. B) Bar graph from multiple replicates (n>20) demonstrating that PARylation of PARP2 in the presence of HPF1 is 1.4-fold slower than in its absence ( $k_{\text{obs}(+\text{HPF1})} = 0.090 \pm 0.011 \text{ s}^{-1}$  vs.  $k_{\text{obs}(-\text{HPF1})} = 0.034 \pm 0.003 \text{ s}^{-1}$ ). Note that  $k_{\text{obs}}$  is the same for both PARP1 and PARP2 in the absence of HPF1.

**Supplementary Figure 5:** The F280A mutant of HPF1 does not bind to the PARP1 – Nuc165 complex, despite having a similar melting temperature as wild-type HPF1. A) Representative FRET binding experiment performed as in Fig. 3 comparing wild-type HPF1 with the F280A mutant. B) Representative derivative data from the thermal melt curves comparing wild-type HPF1 with the F280A mutant. The average melting temperatures from multiple replicates were  $50.6^{\circ}\text{C} \pm 0.2^{\circ}\text{C}$  (n=5) and  $51.2^{\circ}\text{C} \pm 0.2^{\circ}\text{C}$  (n=3) for the wild-type and mutant proteins, respectively.

| PARPi              | PARP1         |                         |                                                 |                                                           | PARP2         |                         |                                                 |                                                        |
|--------------------|---------------|-------------------------|-------------------------------------------------|-----------------------------------------------------------|---------------|-------------------------|-------------------------------------------------|--------------------------------------------------------|
|                    | $t_{1/2}$ (s) | $t_{1/2}$ (s)<br>+ HPF1 | $k_{on}$<br>( $\mu\text{M}^{-1}\text{s}^{-1}$ ) | $k_{on}$<br>( $\mu\text{M}^{-1}\text{s}^{-1}$ )<br>+ HPF1 | $t_{1/2}$ (s) | $t_{1/2}$ (s)<br>+ HPF1 | $k_{on}$<br>( $\mu\text{M}^{-1}\text{s}^{-1}$ ) | $k_{on}$ ( $\mu\text{M}^{-1}\text{s}^{-1}$ ) +<br>HPF1 |
| <b>Olaparib</b>    | 561 ± 204     | 2880 ± 887              | 1.3 ± 0.4                                       | 1.2 ± 0.3                                                 | 245 ± 66      | 243 ± 43                | 8.9 ± 2.0                                       | 8.2 ± 3.1                                              |
| <b>AZD-2461</b>    | 283 ± 120     | 1245 ± 341              | 1.3 ± 0.5                                       | 0.7 ± 0.1                                                 | n.d.          | n.d.                    | n.d.                                            | n.d.                                                   |
| <b>A-966492</b>    | 275 ± 9       | 2310 ± 52               | 3.7 ± 0.8                                       | 1.0 ± 0.1                                                 | n.d.          | n.d.                    | n.d.                                            | n.d.                                                   |
| <b>Niraparib</b>   | 522 ± 125     | 1700 ± 35               | 1.2 ± 0.2                                       | 0.6 ± 0.04                                                | n.d.          | n.d.                    | n.d.                                            | n.d.                                                   |
| <b>Veliparib</b>   | 372 ± 70      | 1800 ± 594              | 2.0 ± 0.3                                       | 0.5 ± 0.2                                                 | 83 ± 15       | ~30                     | 1.0 ± 0.4                                       | 4.4 ± 1.6                                              |
| <b>Rucaparib</b>   | 3450 ± 1180   | >15000                  | 2.8 ± 1.9                                       | 0.8 ± 0.2                                                 | n.d.          | n.d.                    | n.d.                                            | n.d.                                                   |
| <b>Talazoparib</b> | 7300 ± 1200   | >20000                  | 8.7 ± 2.9                                       | 3.7 ± 1.4                                                 | 410 ± 35      | 550 ± 142               | 9.6 ± 1.8                                       | 8.6 ± 1.2                                              |

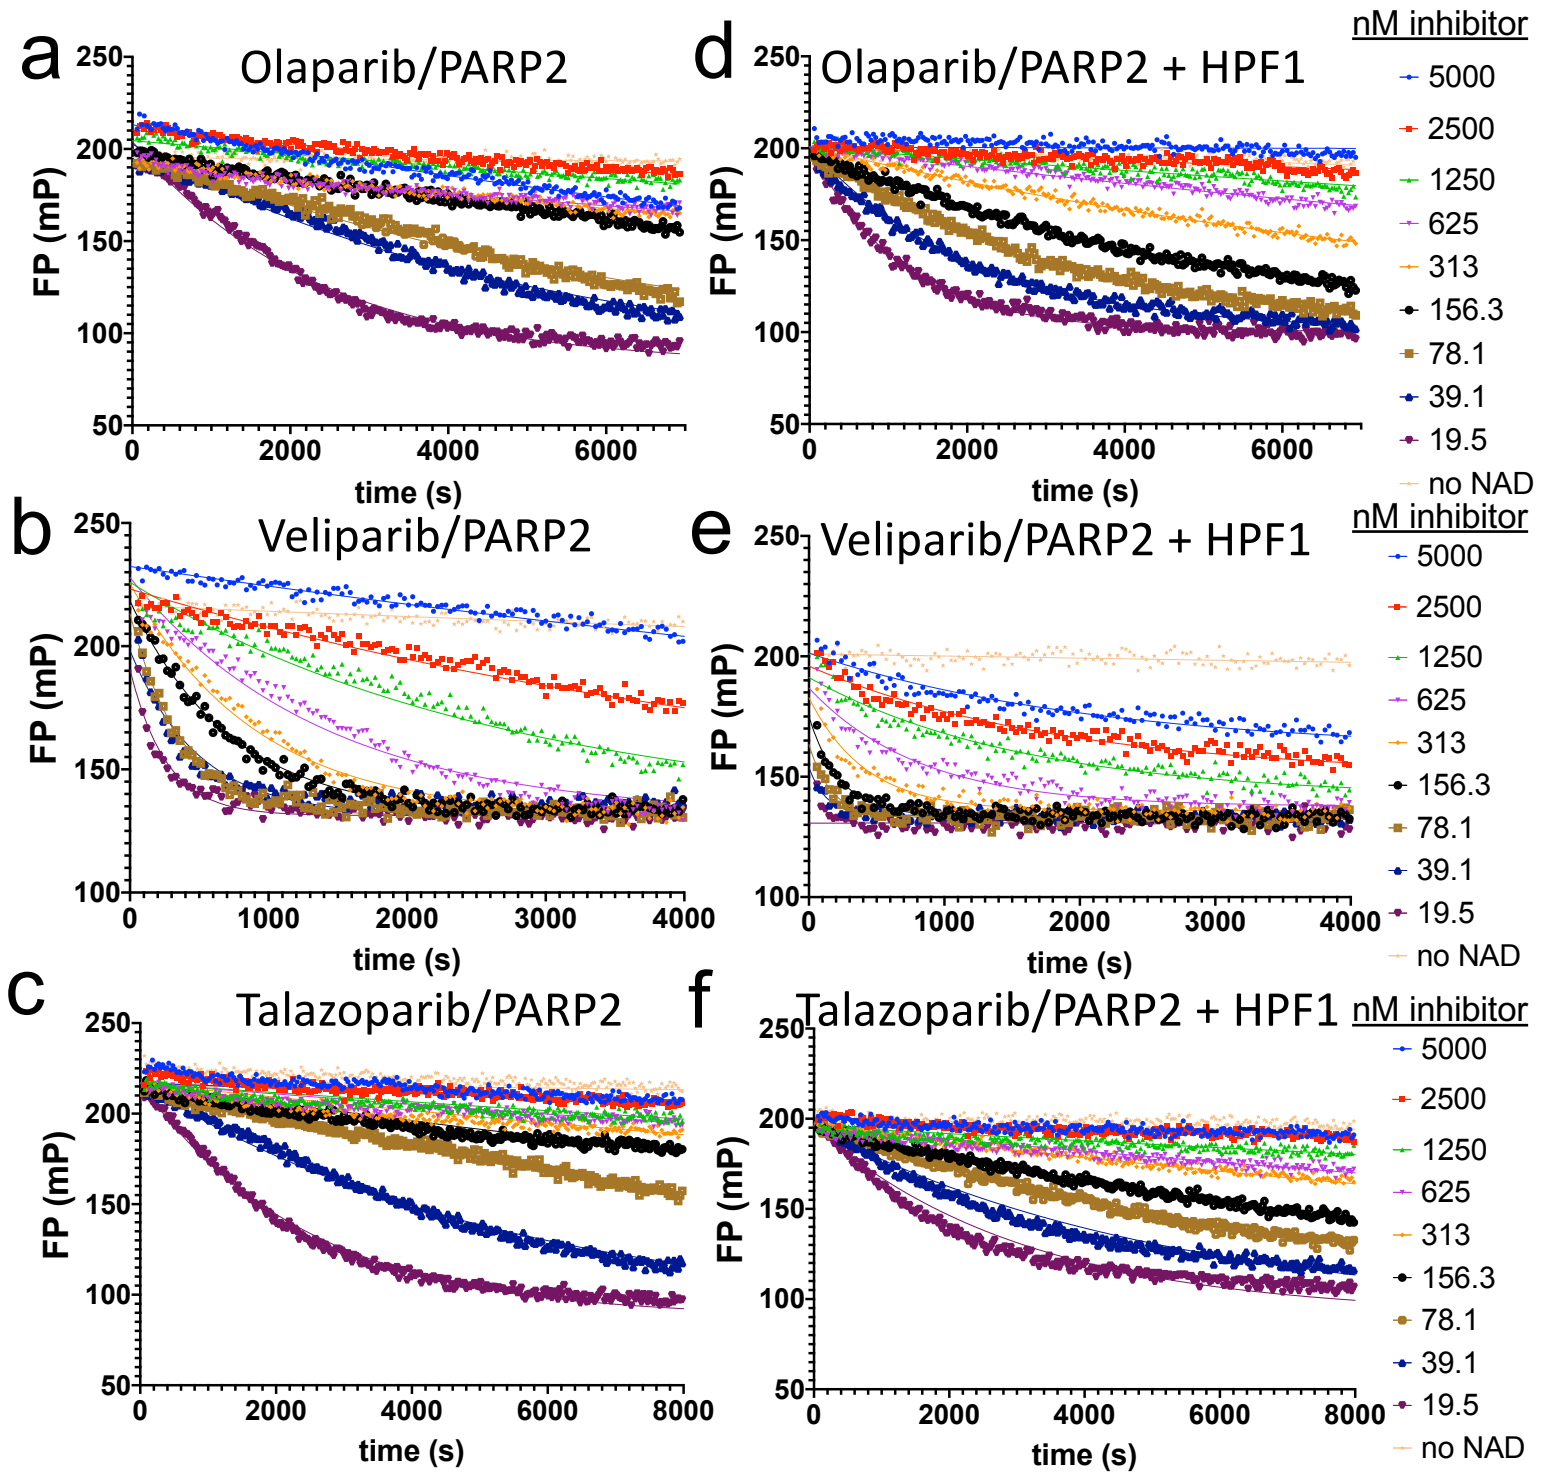

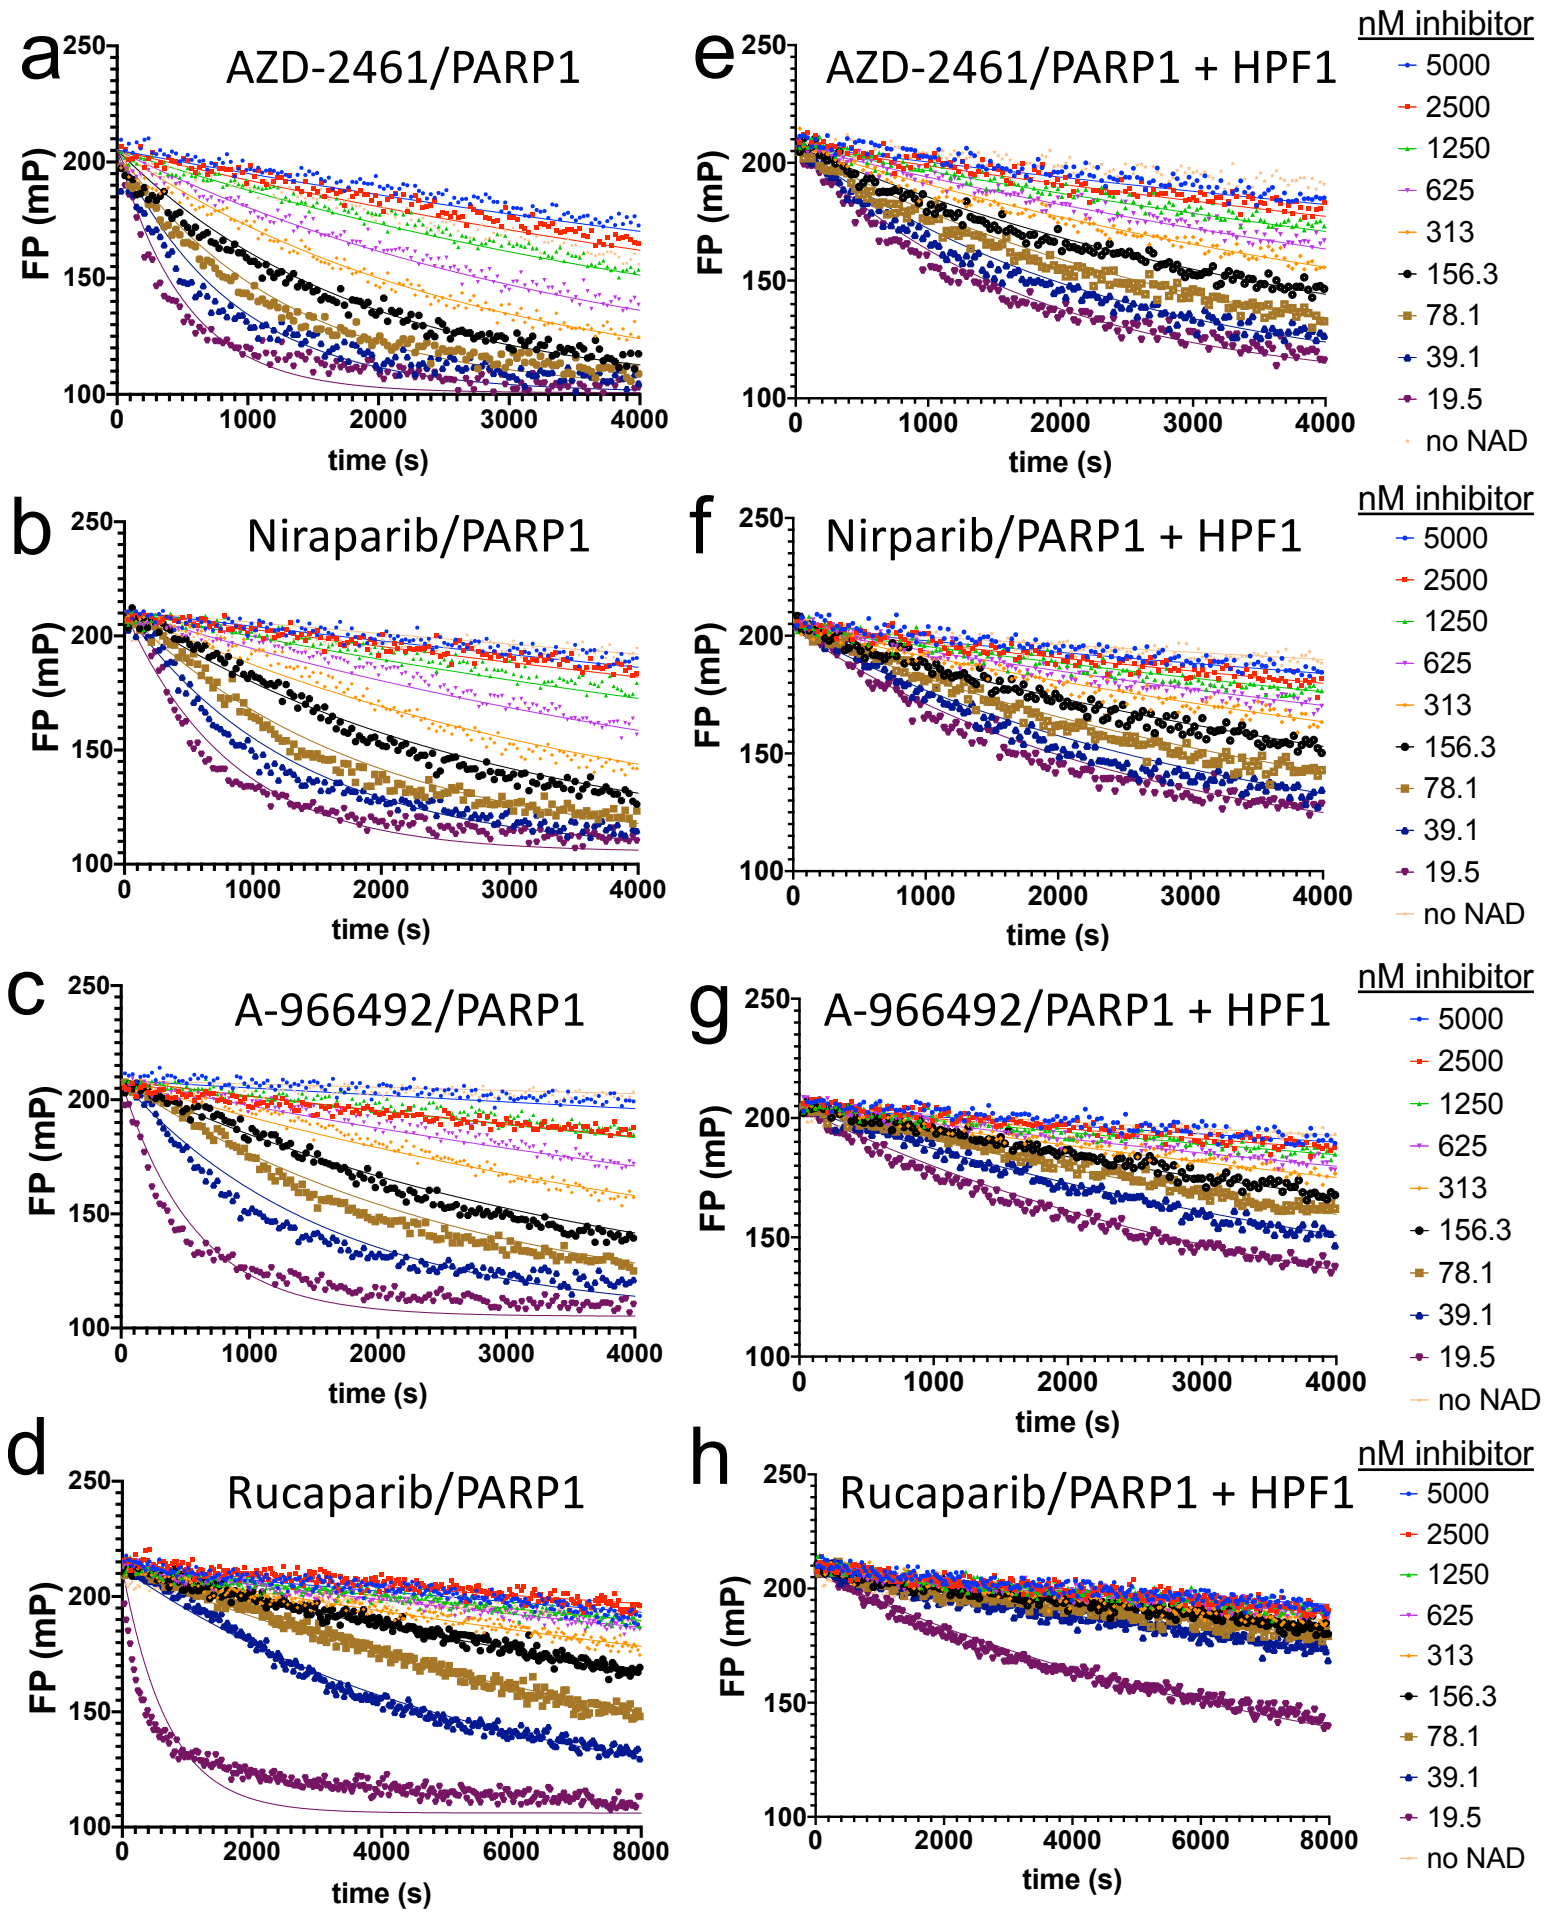

Supp. Fig. 2

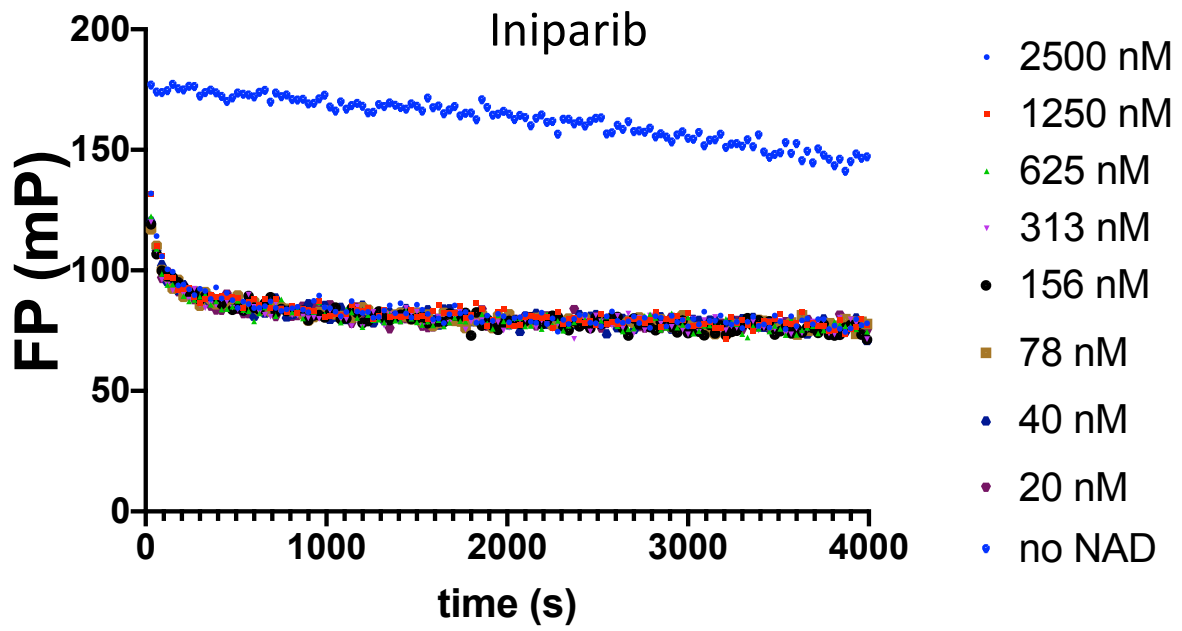

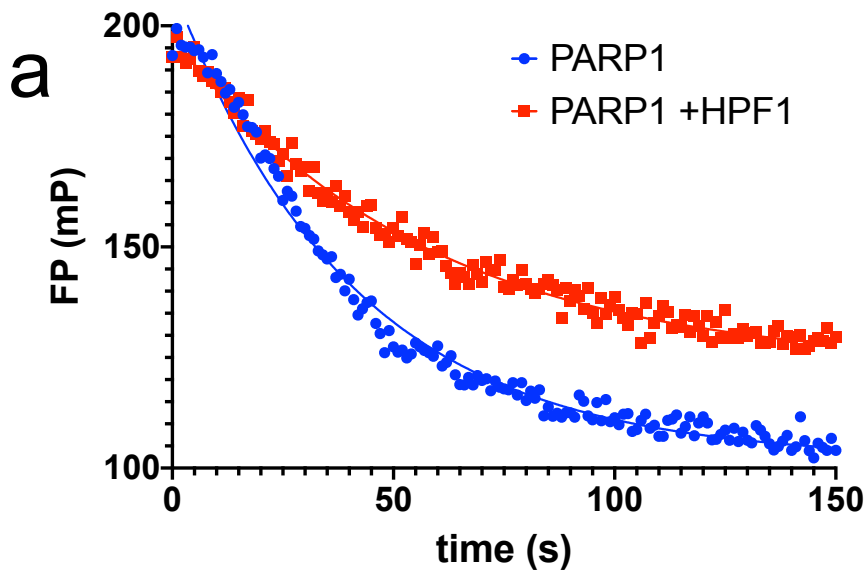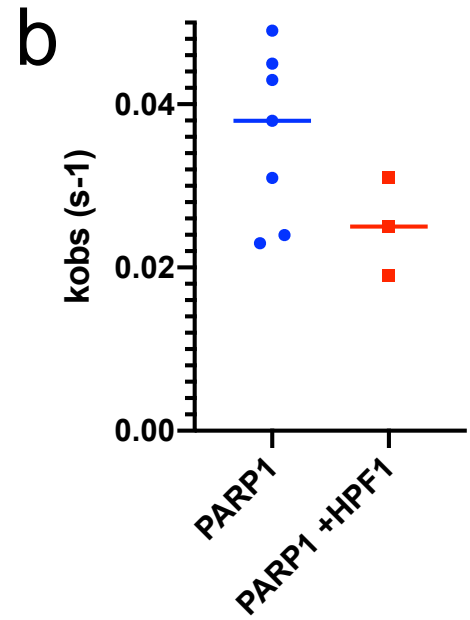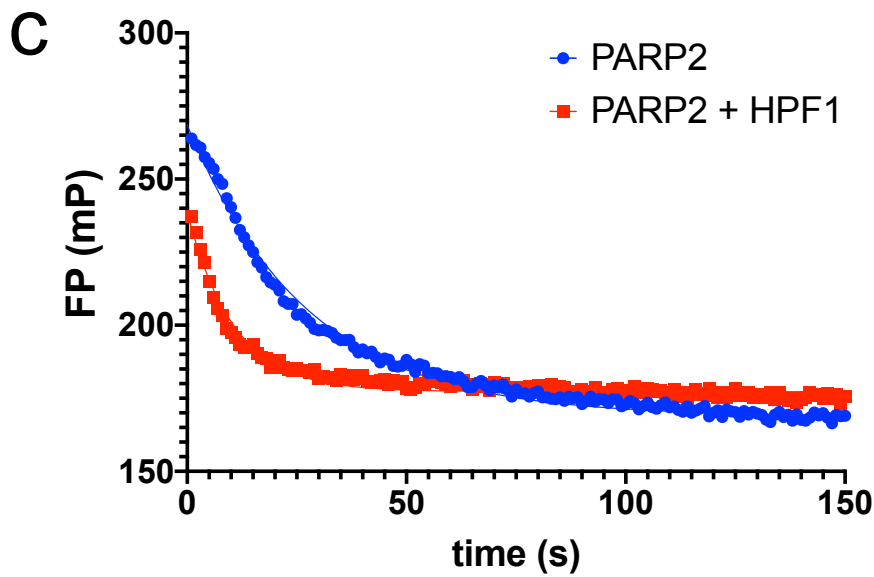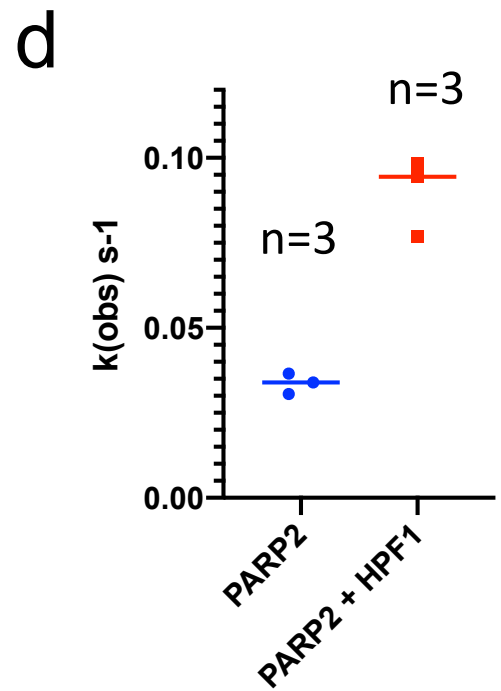

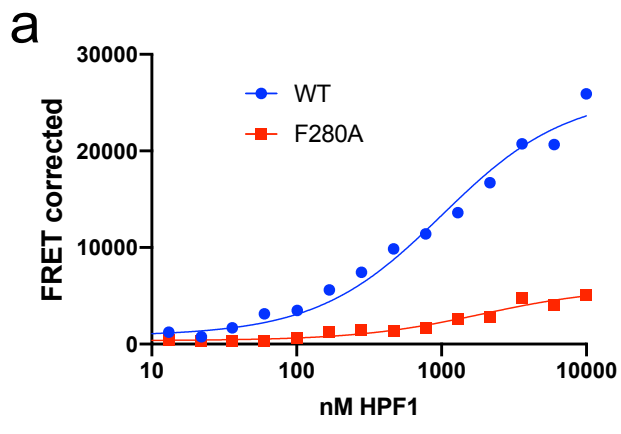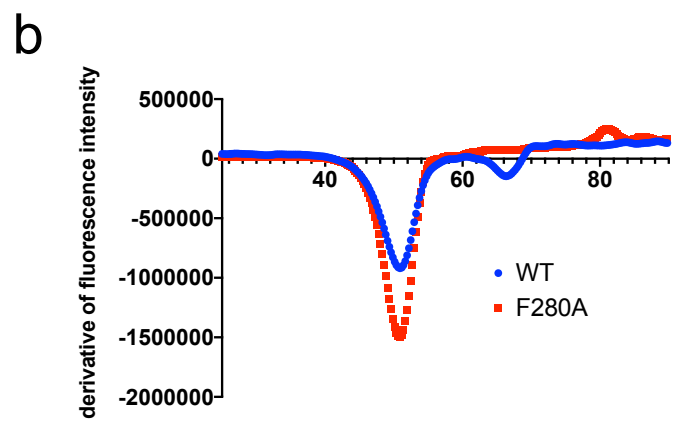

Supplement: 41467_2021_20998_MOESM1_ESM.pdf [file 41467_2021_20998_MOESM1_ESM.pdf]
